# Supplementary material
Source: publisher site journal article supplement (https://www.dovepress.com/article/466115)
Supplement: Supplementary file 1 [file get_supplementary_file.php]

**Supplementary File 1: Patient CT Scan Experience Questionnaire**

**Section 1: Patient Demographics and Medical Background**

1. **Age:**
   - 18-24 years
   - 25-39 years
   - 40-60 years
   - 60 years or older
2. **Gender:**
   - Male
   - Female
3. **Education Level:**
   - Less than high school
   - High school graduate
   - University/College degree
4. **Which specialty is following up with you?**
   - Oncology
   - General Surgery
   - Internal Medicine
   - Orthopedics
   - Family Medicine
   - Urology
   - ENT
   - Others (Please specify): ___________
5. **How many times have you undergone a CT scan previously?**
   - Never
   - Once
   - Twice
   - Three times
   - More than three times

**Section 2: Doctor-Patient Communication**

1. **Has your doctor explained to you why you need this scan?**
   - Yes
   - No
2. **Has your doctor mentioned the amount of radiation associated with this scan?**
   - Yes
   - No
3. **Has your doctor mentioned the risks associated with the radiation expected from this examination?**
   - Yes
   - No

**Section 3: Patient Perceptions and Preferences**

1. **What is the effect of the information you receive from your doctor?**
   - I do not trust it
   - It has no special effect on me
   - It reassures me
   - Not explained
2. **Do you think you should be told about why you need a CT scan?**
   - Yes
   - No
3. **Do you expect to be told about the associated risks?**
   - Yes
   - No
4. **Do you think you should be told about the radiation dose?**
   - Yes
   - No

**Section 4: Awareness of Computed Tomography Radiation Risks**

1. **Are you aware that CT scans involve harmful radiation?**
   - Yes
   - No
2. **Are you aware that the amount of radiation varies depending on the type of CT scan?**
   - Yes
   - No
3. **Did your awareness of radiation risks influence your decision to undergo the CT scan?**
   - Yes
   - No
